# Supplementary material for: Accelerating structure prediction of molecular crystals using actively trained moment tensor potential
Source: Royal Society of Chemistry journal article supplement (doi:10.1039/d4cp04578e), 2025-01-01
Supplement: d4cp04578e1.pdf [file d4cp04578e1.pdf]

Accelerating Structure Prediction of Molecular Crystals using  
Actively Trained Moment Tensor Potential  
Supporting Materials

Nikita Rybin<sup>1,2</sup>, Ivan S. Novikov<sup>1,3,4</sup>, and Alexander Shapeev<sup>1,2</sup>

<sup>1</sup>*Skolkovo Institute of Science and Technology, Bolshoi bulvar 30, build.1, 121205, Moscow, Russian Federation*

<sup>2</sup>*Digital Materials LLC, Kashirskoe rd., build.3/12, 115230, Moscow, Russian Federation*

<sup>3</sup>*Moscow Institute of Physics and Technology, 9 Institutskiy per., Dolgoprudny, Moscow Region, 141701, Russian Federation*

<sup>4</sup>*Emanuel Institute of Biochemical Physics, Kosigina st. 4, 119334 Moscow, Russian Federation*

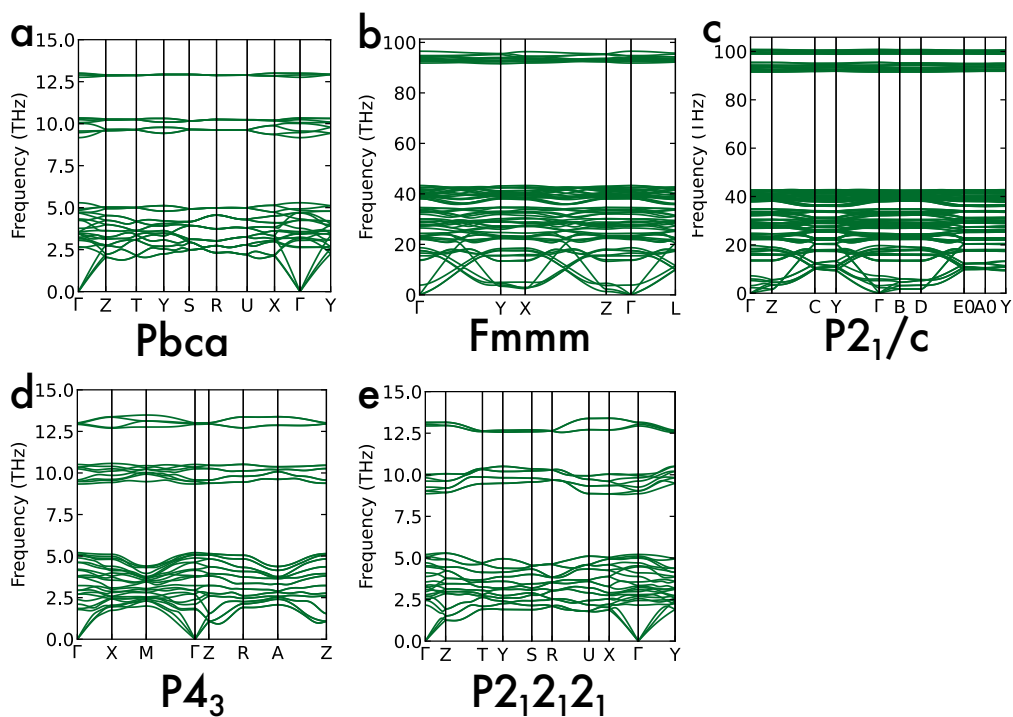

Figure 1: (a-e) Phonon spectrums of various (the most energetically favorable) benzene polymorphs computed using MTP.

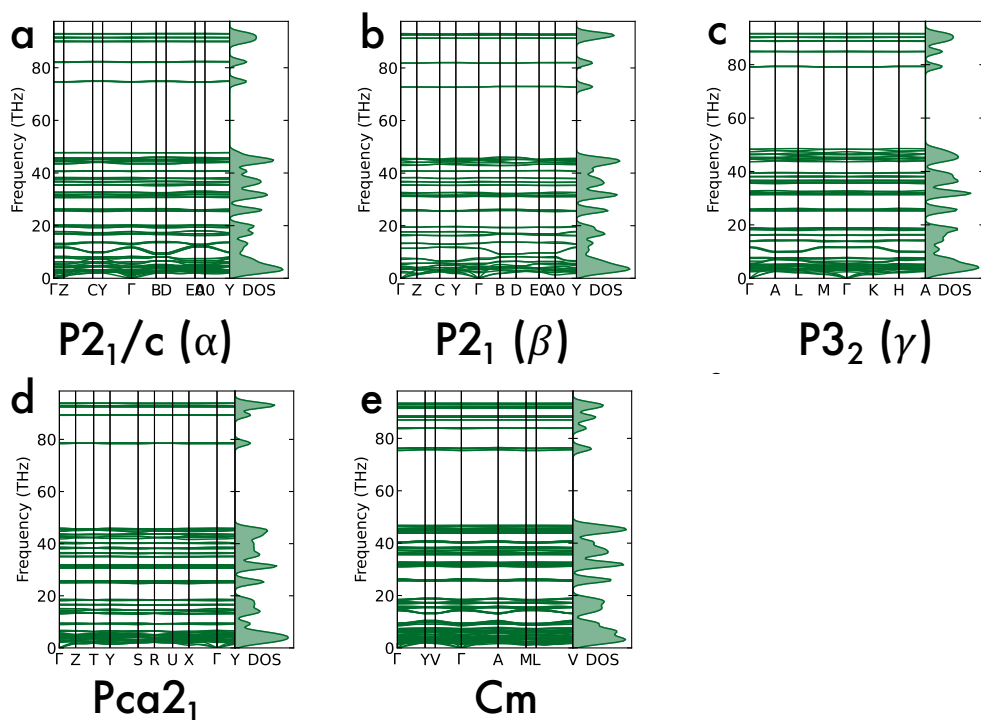

Figure 2: (a-e) Phonon spectrums of various (the most energetically favorable) polymorphs of glycine computed using MTP.
